# Supplementary material for: Systematic proteomic analysis of LRRK2-mediated Rab GTPase phosphorylation establishes a connection to ciliogenesis
Source: eLife journal article supplement (doi:10.7554/elife.31012), 2017-11-10
Supplement: supp [file elife-31012-supp-v1.zip]

Archive with 10 entries (10 files):
- elife_poa_e31012_Transparent_Reporting_File.pdf
- elife_poa_e31012_Figure_2_figure_supplement_2.pdf
- elife_poa_e31012_Figure_1_figure_supplement_1.pdf
- elife_poa_e31012_Figure_1_figure_supplement_3.pdf
- elife_poa_e31012_Figure_1_figure_supplement_2.pdf
- elife_poa_e31012_Supplementary_File_1.xlsx
- elife_poa_e31012_Figure_2_figure_supplement_1.pdf
- elife_poa_e31012_Figure_3_figure_supplement_1.pdf
- elife_poa_e31012_Figure_3_figure_supplement_3.pdf
- elife_poa_e31012_Figure_3_figure_supplement_2.pdf
