# Supplementary material for: Systematic proteomic analysis of LRRK2-mediated Rab GTPase phosphorylation establishes a connection to ciliogenesis
Source: eLife journal article supplement (doi:10.7554/elife.31012), 2017-11-10
Supplement: supp [file elife-31012-supp-v1.zip › elife_poa_e31012_Figure_1_figure_supplement_1.pdf]

|         |     |                        |   |                              |     |
|---------|-----|------------------------|---|------------------------------|-----|
| RAB1A   | 56  | D-GKTIKLQIWDTAGQERFR-  | T | ITSSYYRGAHGIIVVYDVTDQESFNN   | 101 |
| RAB1B   | 53  | D-GKTIKLQIWDTAGQERFR-  | T | ITSSYYRGAHGIIVVYDVTDQESYAN   | 98  |
| RAB1C   | 53  | D-GKTIKLQIWDTAGQERFW-  | T | ITSSYYRGAHGFLVVYDVTDQESYAN   | 98  |
| RAB2A   | 51  | D-GKQIKLQIWDTAGQESFR-  | S | ITRSYYRGAAGALLVYDITRRDTFNH   | 96  |
| RAB2B   | 51  | D-GKQIKLQIWDTAGQESFR-  | S | ITRSYYRGAAGALLVYDITRRETFNH   | 96  |
| RAB3A   | 67  | N-DKRIKLQIWDTAGQERYR-  | T | ITTAYYRGAMGFILMYDITNEESFNA   | 112 |
| RAB3B   | 67  | H-EKRVKLQIWDTAGQERYR-  | T | ITTAYYRGAMGFILMYDITNEESFNA   | 112 |
| RAB3C   | 75  | N-EKRIKLQIWDTAGQERYR-  | T | ITTAYYRGAMGFILMYDITNEESFNA   | 120 |
| RAB3D   | 67  | H-DKRIKLQIWDTAGQERYR-  | T | ITTAYYRGAMGFLLMYDIANQESFAA   | 112 |
| RAB4A   | 58  | G-GKYVKLQIWDTAGQERFR-  | S | VTRSYYRGAAGALLVYDITSRETYNA   | 103 |
| RAB4B   | 53  | G-GKTVKLQIWDTAGQERFR-  | S | VTRSYYRGAAGALLVYDITSRETYNS   | 98  |
| RAB5A   | 65  | D-DTTVKFEIWDTAGQERYH-  | S | LAPMYRGAQAIVVYDITNEESFAR     | 110 |
| RAB5B   | 65  | D-DTTVKFEIWDTAGQERYH-  | S | LAPMYRGAQAIVVYDITNQETFAR     | 110 |
| RAB5C   | 66  | D-DTTVKFEIWDTAGQERYH-  | S | LAPMYRGAQAIVVYDITNTDTFAR     | 111 |
| RAB6A   | 58  | E-DRTVRLQLWDTAGQERFR-  | S | LIPSYIRDSTVAVVVYDITNVNSFQQ   | 103 |
| RAB6B   | 58  | E-DRTVRLQLWDTAGQERFR-  | S | LIPSYIRDSTVAVVVYDITNLNSFQQ   | 103 |
| RAB6C   | 58  | E-DGTIGLRLWDTAGQERLR-  | S | LIPRYIRDSAAAVVVYDITNVNSFQQ   | 103 |
| RAB7A   | 53  | D-DRLVTMQIWDTAGQERFQ-  | S | LGVAFYRGADCCVLVFDVTAPNTFKT   | 98  |
| RAB7B   | 53  | G-DTTLKLQIWDTAGQERFR-  | S | MVSTFYKGS DGCILAFDVTDLSEFEA  | 98  |
| RAB8A   | 53  | D-GKRIKLQIWDTAGQERFR-  | T | ITTAYYRGAMGIMLVYDITNEKSFDN   | 98  |
| RAB8B   | 53  | D-GKKIKLQIWDTAGQERFR-  | T | ITTAYYRGAMGIMLVYDITNEKSFDN   | 98  |
| RAB9A   | 52  | D-GHFVTMQIWDTAGQERFR-  | S | L RTPFYRGSDCCLLTFSVDDSQSFQN  | 97  |
| RAB9B   | 52  | D-GRFVTLQIWDTAGQERFK-  | S | L RTPFYRGADCCCLLTFSVDDRQSFEN | 97  |
| RAB10   | 54  | Q-GKKIKLQIWDTAGQERFH-  | T | ITTSYYRGAMGIMLVYDITNGKSFEN   | 99  |
| RAB12   | 87  | R-GKKIRLQIWDTAGQERFN-  | S | ITSAYYRS AKGIILVYDITKKETFDD  | 132 |
| RAB13   | 53  | E-GKKIKLQVWDTAGQERFK-  | T | ITTAYYRGAMGIILVYDITDEKSFEN   | 98  |
| RAB15   | 53  | D-GIKVRIQIWDTAGQERYQ-  | T | ITKQYYRRAQGIFLVYDISSERSYQH   | 98  |
| RAB17   | 63  | G-ATSLKLEIWDTAGQEKYH-  | S | VCHLYFRGANAALLVYDITRKDSFLK   | 108 |
| RAB18   | 53  | D-GNKAKLAIWDTAGQERFR-  | T | LTPSYRGAQGVIILVYDVTRRDTFVK   | 98  |
| RAB19   | 62  | D-GKKVKMQVWDTAGQERFR-  | T | ITQSYRSAHAIIAYDLTRRSTFES     | 107 |
| RAB26   | 109 | D-GVKVKLQMWDTAGQERFR-  | S | VTHAYYRDAHALLLLYDVTNKASFDN   | 154 |
| RAB27A  | 64  | R-GQRIHLQLWDTAGQERFR-  | S | LTTAFFRDAMGFLLLFDLTNEQSFNL   | 109 |
| RAB27B  | 64  | K-AFKVHLQLWDTAGQERFR-  | S | LTTAFFRDAMGFLLMFDLTSQQSFNL   | 109 |
| RAB29   | 52  | SDYEIVRLQLWDIAGQERFT-  | S | MTRLYYRDASACVIMFDVTNATTFSN   | 98  |
| RAB30   | 54  | N-GEKVKLQIWDTAGQERFR-  | S | ITQSYRSANALILTYDITCEESFRC    | 99  |
| RAB31   | 50  | G-NELHKFLIWDTAGQERFH-  | S | LAPMYRGSAAAVIVYDITKQDSFYT    | 95  |
| RAB33A  | 81  | E-GEKIKVQVWDTAGQERFRK- | S | MVEHYRNVHAVVFVYDVTKMTSFTN    | 127 |
| RAB33B  | 78  | D-GERIKIQLWDTAGQERFRK- | S | MVQHYYRNVHAVVFVYDMTNMASFHS   | 124 |
| RAB35   | 53  | N-GEKVKLQIWDTAGQERFR-  | T | ITSTYYRGTHGVIVVYDVTSAESFVN   | 98  |
| RAB37   | 75  | D-GVRVKLQIWDTAGQERFR-  | S | VTHAYYRDAQALLLYDITNKSSFDN    | 120 |
| RAB39A  | 57  | EPGKRIKLQLWDTAGQERFR-  | S | ITRSYYRNSVGGFLVFDITNRRSFEH   | 103 |
| RAB39B  | 53  | EPGKRIKLQIWDTAGQERFR-  | S | ITRAYYRNSVGGLLLFYDITNRRSFQN  | 99  |
| RAB40A  | 59  | D-GQRVKLKLWDTSQGGRFC-  | T | IFRSYSRGAQGVILVYDIANRWSFEG   | 104 |
| RAB40B  | 59  | D-GRRVKLQLWDTSQGGRFC-  | T | IFRSYSRGAQGVILVYDIANRWSFDG   | 104 |
| RAB40C  | 59  | D-GRRVKLELWDTSQGGRFC-  | T | IFRSYSRGAQGILLVYDITNRWSFDG   | 104 |
| RAB40AL | 59  | D-GQRVKLKLWDTSQGGRFC-  | T | IFRSYSRGAQGVILVYDIANRWSFEG   | 104 |
| RAB41   | 76  | E-DQIVQLQLWDTAGQERFH-  | S | LIPSYIRDSTIAVVVYDITNINSFKE   | 121 |
| RAB43   | 63  | Q-GKRVKLQIWDTAGQERFR-  | T | ITQSYRSANGAILAYDITKRSSFLS    | 108 |
| RAB44   | 581 | D-NKCFVLQLWDTAGQERYH-  | S | MTRQLLRKADGVVLMYDITSQESFAH   | 626 |
| RAB45   | 586 | D-GERTVLQLWDTAGQERFR-  | S | IAKS YFRKADGVLLLYDVTCEKSFLN  | 631 |
