# Supplementary material for: Systematic proteomic analysis of LRRK2-mediated Rab GTPase phosphorylation establishes a connection to ciliogenesis
Source: eLife journal article supplement (doi:10.7554/elife.31012), 2017-11-10

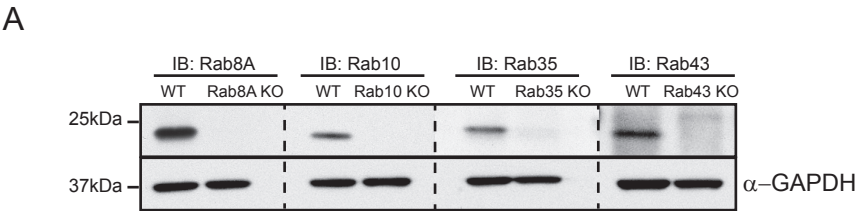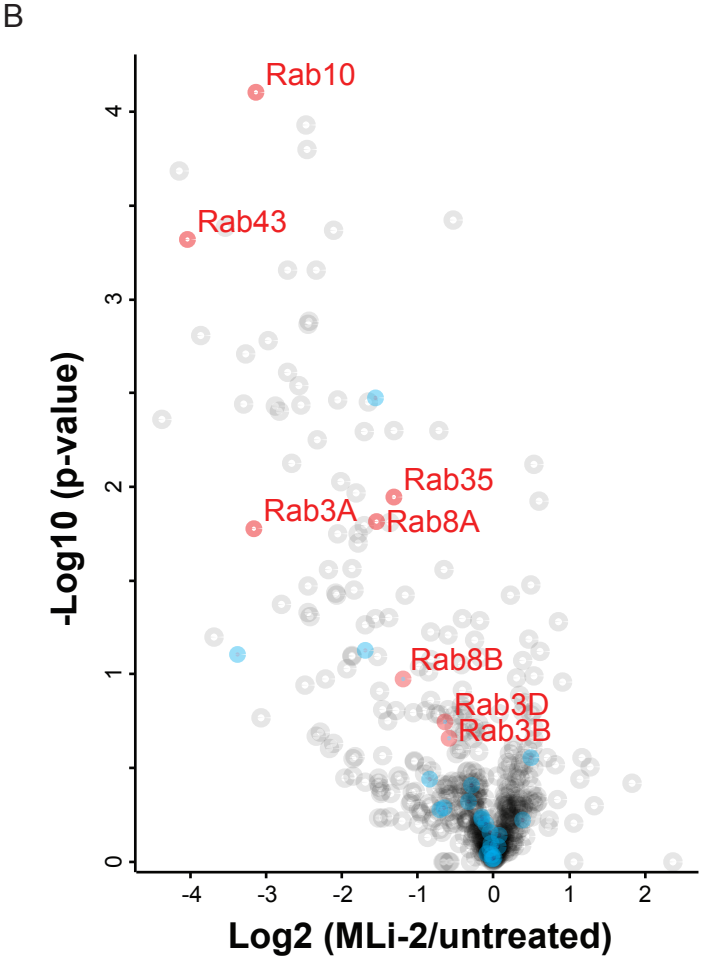

**C**

| Rab protein   | Fold change (Mli-2 vs control) |
|---------------|--------------------------------|
| Rab33B        | N/A                            |
| Rab3D;Rab3C   | 1.6                            |
| Rab5C         | 1.0                            |
| Rab6A         | 1.0                            |
| Rab21         | 1.1                            |
| Rab12         | 1.1                            |
| Rab23         | 1.1                            |
| Rab24         | 1.6                            |
| Rab18         | 1.1                            |
| Rab11B;Rab11A | 1.0                            |
| Rab7A         | 1.0                            |
| Rab2A         | 1.1                            |
| Rab8A         | 2.9                            |
| Rab5B         | 1.0                            |
| Rab10         | 8.8                            |
| Rab8B         | 2.3                            |
| Rab6B         | 1.6                            |
| Rab1A         | 1.2                            |
| Rab3A         | 9.0                            |
| Rab34         | 1.3                            |
| Rab35         | 2.5                            |
| Rab39A        | 10.4                           |
| Rab43         | 16.3                           |
| Rab14         | 1.0                            |
| Rab4B;Rab4A   | 2.9                            |
| Rab31         | 1.0                            |
| Rab5A         | 1.0                            |
| Rab32         | 3.2                            |
| Rab3B         | 1.5                            |
| Rab1B         | 1.3                            |
| Rab13         | 1.4                            |
| Rab9B         | 1.8                            |

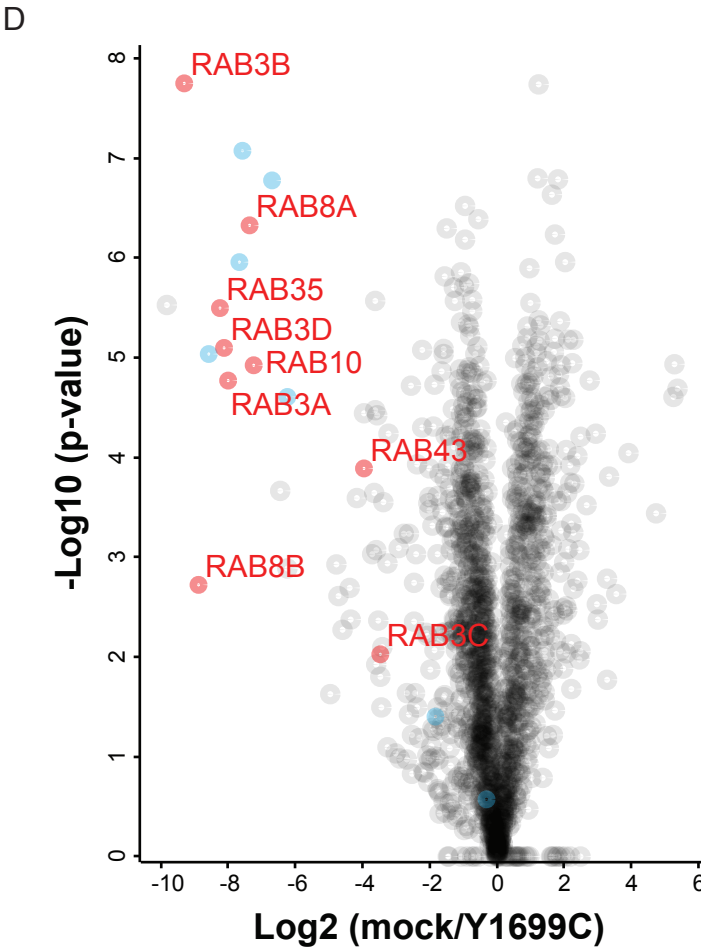

Supplement: supp [file elife-31012-supp-v1.zip › elife_poa_e31012_Figure_2_figure_supplement_2.pdf]
