# Supplementary material for: Systematic proteomic analysis of LRRK2-mediated Rab GTPase phosphorylation establishes a connection to ciliogenesis
Source: eLife journal article supplement (doi:10.7554/elife.31012), 2017-11-10
Supplement: supp [file elife-31012-supp-v1.zip › elife_poa_e31012_Supplementary_File_1.xlsx]

## Sheet: Sheet1
		DETECTED
Rab	PREDICTED LRRK2 TARGET SITE	PHOSPHOPEPTIDE	UNMODIFIED COUNTERPART	ENZYME	PREDICTED PHOSPHOPEPTIDE SEQUENCE
RAB1A	T75	Yes	Yes	TRYPSIN	FRTITSSYYR
RAB1B	T72	Yes	Yes	TRYPSIN	FRTITSSYYR
RAB1C	T72	No	Yes	TRYPSIN	FWTITSSYYR
RAB2A	S70	Yes	Yes	TRYPSIN	LQIWDTAGQESFRSITR
RAB2B	S70	Yes	Yes	TRYPSIN	LQIWDTAGQESFRSITR
RAB3A	T86	Yes	Yes	TRYPSIN	YRTITTAYYR
RAB3B	T86	Yes	Yes	TRYPSIN	YRTITTAYYR
RAB3C	T94	Yes	Yes	TRYPSIN	YRTITTAYYR
RAB3D	T86	Yes	Yes	TRYPSIN	YRTITTAYYR
RAB4A	S77	Yes	Yes	CHYMOTRYPSIN	DTAGQERFRSVTRSY
RAB4B	S72	Yes	Yes	CHYMOTRYPSIN	DTAGQERFRSVTRSY
RAB5A	S84	Yes	Yes	TRYPSIN	YHSLAPMYYR
RAB5B	S84	Yes	Yes	TRYPSIN	YHSLAPMYYR
RAB5C	S85	Yes	Yes	TRYPSIN	YHSLAPMYYR
RAB6A	S77	Yes	Yes	TRYPSIN	FRSLIPSYIR
RAB6B	S77	No	Yes	TRYPSIN	FRSLIPSYIR
RAB6C	S77	No	No	AspN+GluC	RLRSLIPRYIR
RAB7A	S72	Yes	Yes	TRYPSIN	FQSLGVAFYR
RAB7B	S72	Yes	Yes	TRYPSIN	SMVSTFYK
RAB8A	T72	Yes	Yes	TRYPSIN	FRTITTAYYR
RAB8B	T72	Yes	Yes	TRYPSIN	FRTITTAYYR
RAB9A	S71	Yes	No	AspN+GluC	DTAGQERFRSLRTPFYRGS
RAB9B	S71	No	No	AspN+GluC	RFKSLRTPFYRGA
RAB10	T73	Yes	Yes	TRYPSIN	FHTITTSYYR
RAB12	S106	Yes	Yes	TRYPSIN	FNSITSAYYR
RAB13	T72	Yes	Yes	TRYPSIN	FKTITTAYYR
RAB15	T72	No	Yes	TRYPSIN	YQTITKQYYR
RAB17	S82	Yes	Yes	TRYPSIN	YHSVCHLYFR
RAB18	T72	No	Yes	TRYPSIN	TLTPSYYR
RAB19	T81	Yes	Yes	TRYPSIN	FRTITQSYYR
RAB26	S128	Yes	Yes	TRYPSIN	SVTHAYYR
RAB27A	S83	Yes	Yes	TRYPSIN	FRSLTTAFFR
RAB27B	S83	Yes	Yes	TRYPSIN	SLTTAFFR
RAB29	S72	Yes	Yes	TRYPSIN	FTSMTR
RAB29	T71	Yes	Yes	TRYPSIN	FTSMTR
RAB30	S73	Yes	Yes	TRYPSIN	FRSITQSYYR
RAB31	S69	No	Yes	TRYPSIN	FHSLAPMYYR
RAB32*	T92	Yes	Yes	TRYPSIN	FGNMTRVYYK
RAB33A	S101	Yes	Yes	TRYPSIN	SMVEHYYR
RAB33B	S98	Yes	Yes	TRYPSIN	SMVQHYYR
RAB35	T72	Yes	Yes	TRYPSIN	FRTITSTYYR
RAB37	S94	Yes	Yes	TRYPSIN	FRSVTHAYYR
RAB38*	T76	No	Yes	TRYPSIN	FGNMTR
RAB39A	S77	Yes	Yes	CHYMOTRYPSIN	DTAGQERFRSITRSY
RAB39B	S73	Yes	Yes	CHYMOTRYPSIN	DTAGQERFRSITRAY
RAB40A	T77	No	Yes	TRYPSIN	FCTIFR
RAB40AL	T77	No	Yes	TRYPSIN	FCTIFR
RAB40B	T77	No	Yes	TRYPSIN	FCTIFR
RAB40C	T77	No	Yes	TRYPSIN	FCTIFR
RAB41	S95	No	No	TRYPSIN	FHSLIPSYIR
RAB43	T82	Yes	Yes	TRYPSIN	FRTITQSYYR
RAB44	S600	No	Yes	TRYPSIN	YHSMTR
RAB45	S605	No	Yes	CHYMOTRYPSIN	QERFRSIAKSYFRKADG
			Asteriks (*) indicate Rabs in which the predicted LRRK2 phosphorylation site is not conserved.
			Rabs that are phosphorylated by LRRK2 are highlighted.
