# Supplementary figures and images for: Systematic proteomic analysis of LRRK2-mediated Rab GTPase phosphorylation establishes a connection to ciliogenesis
Source: eLife journal article supplement (doi:10.7554/elife.31012), 2017-11-10

A

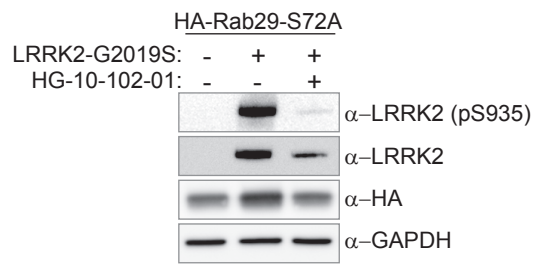

B

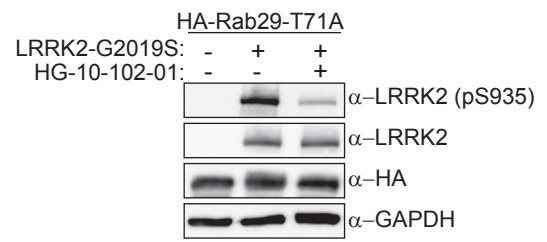

C

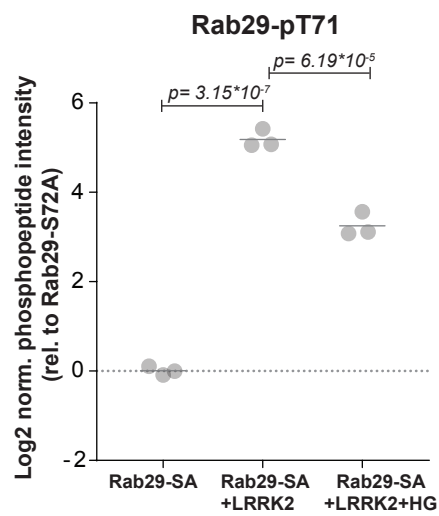

D

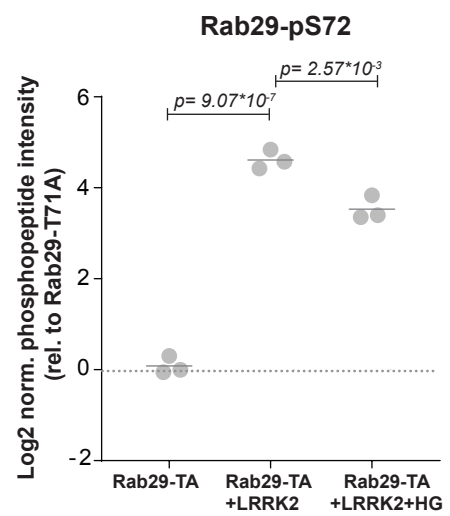

Supplement: supp [file elife-31012-supp-v1.zip › elife_poa_e31012_Figure_1_figure_supplement_3.pdf]

B

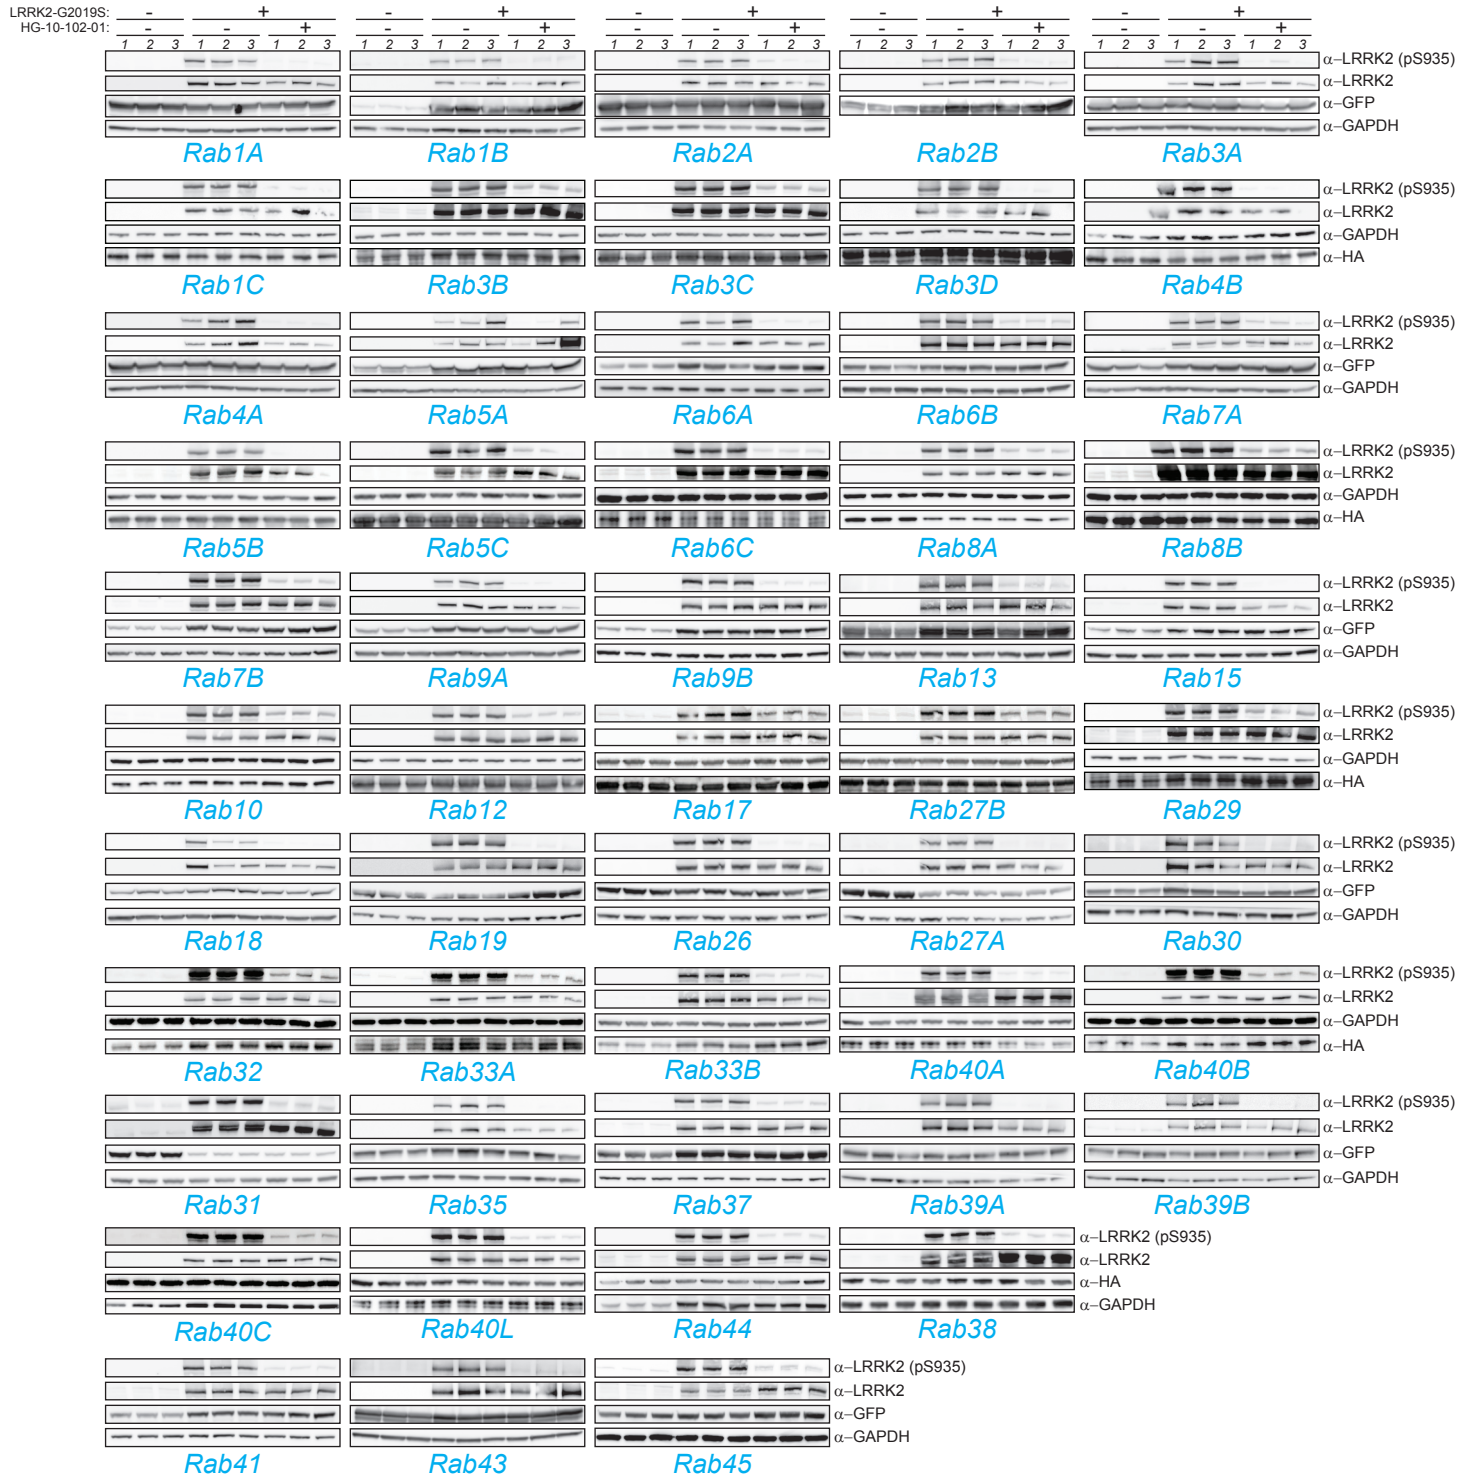

Supplement: supp [file elife-31012-supp-v1.zip › elife_poa_e31012_Figure_1_figure_supplement_2.pdf]

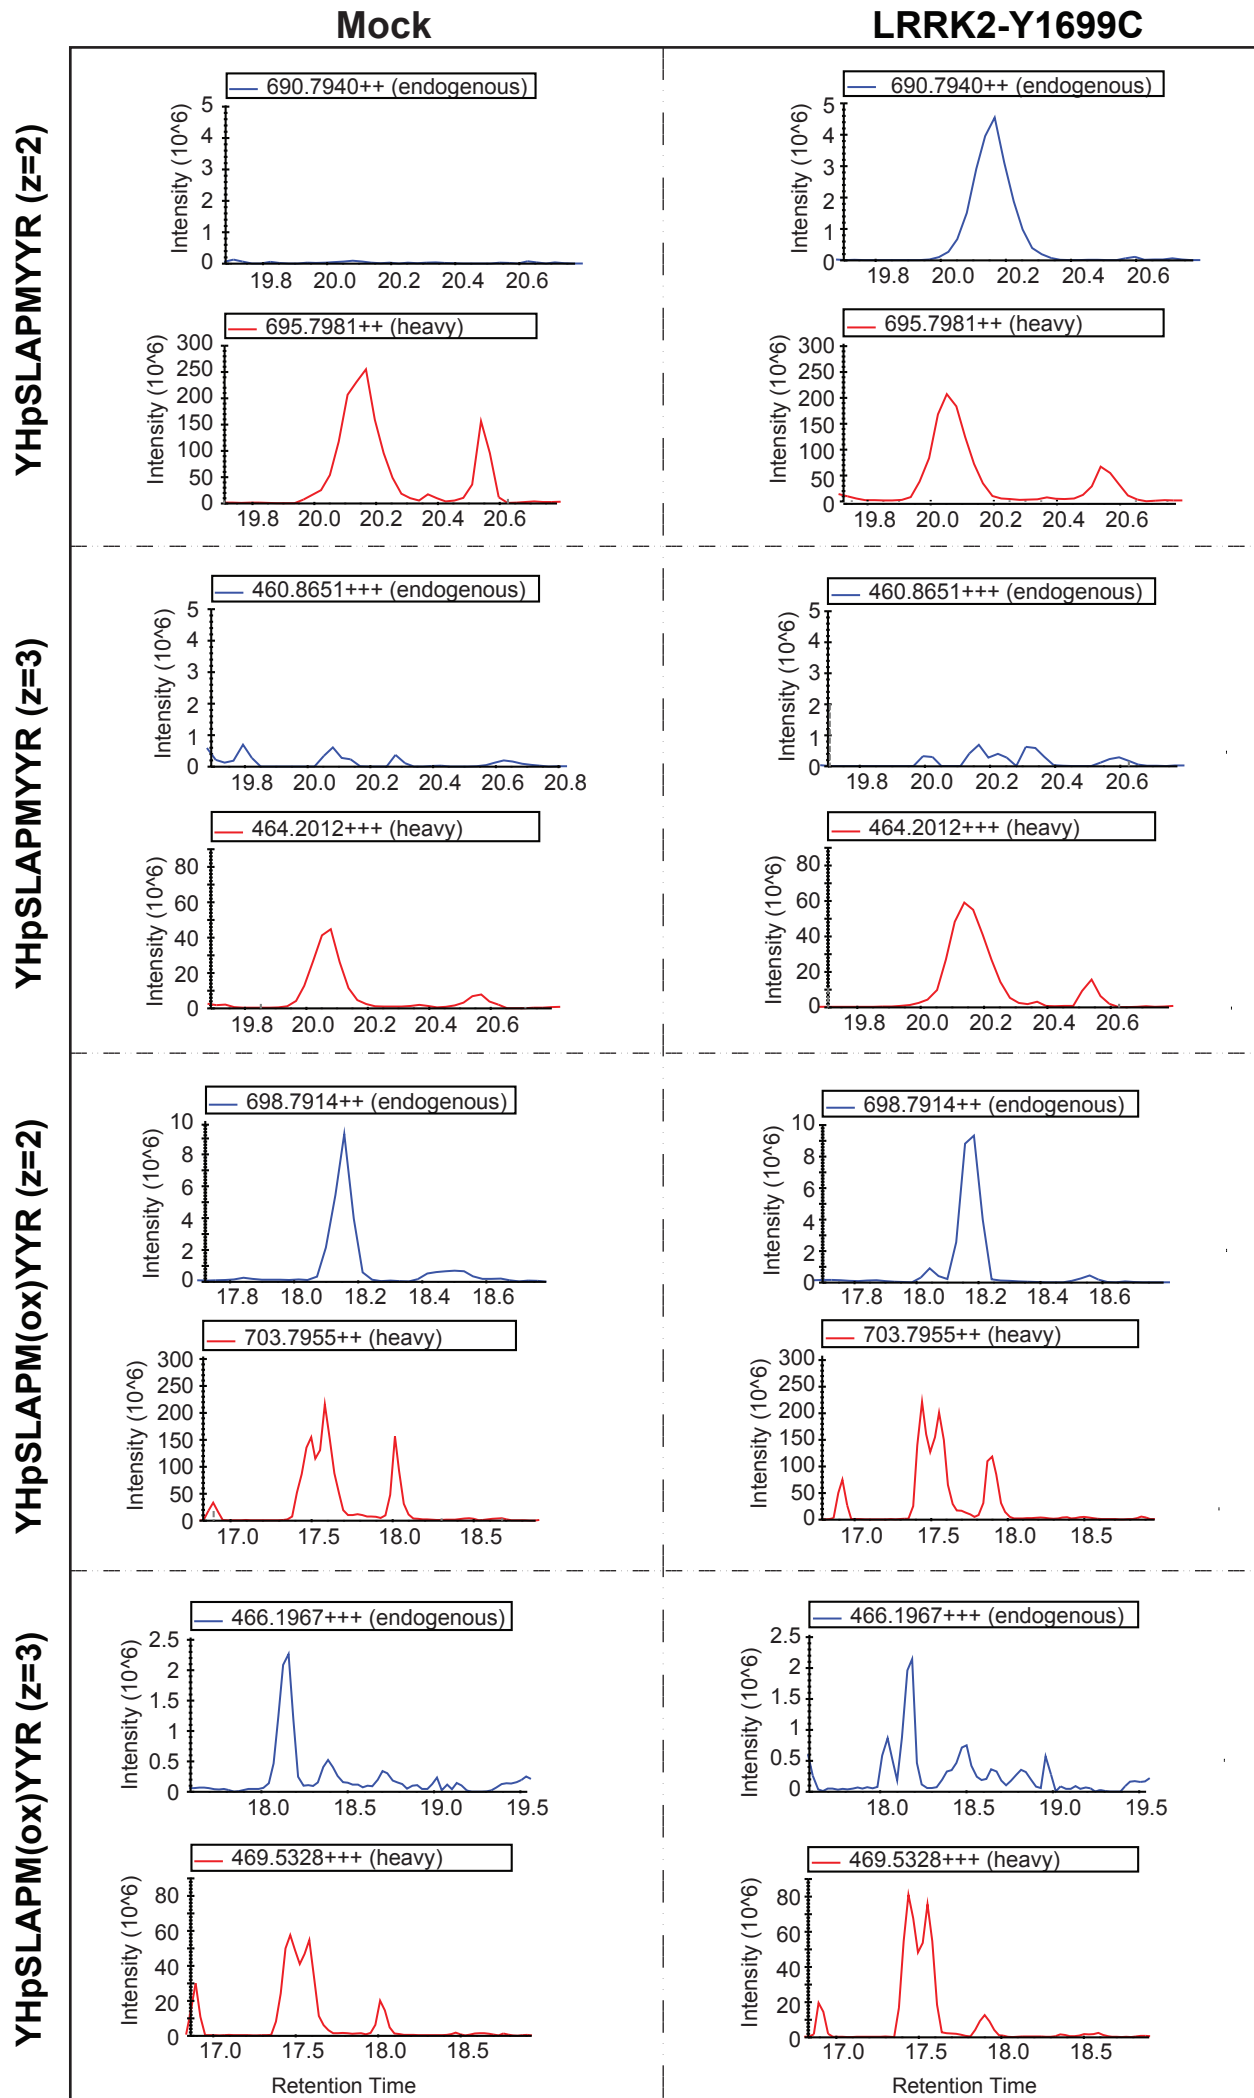

Supplement: supp [file elife-31012-supp-v1.zip › elife_poa_e31012_Figure_2_figure_supplement_1.pdf]

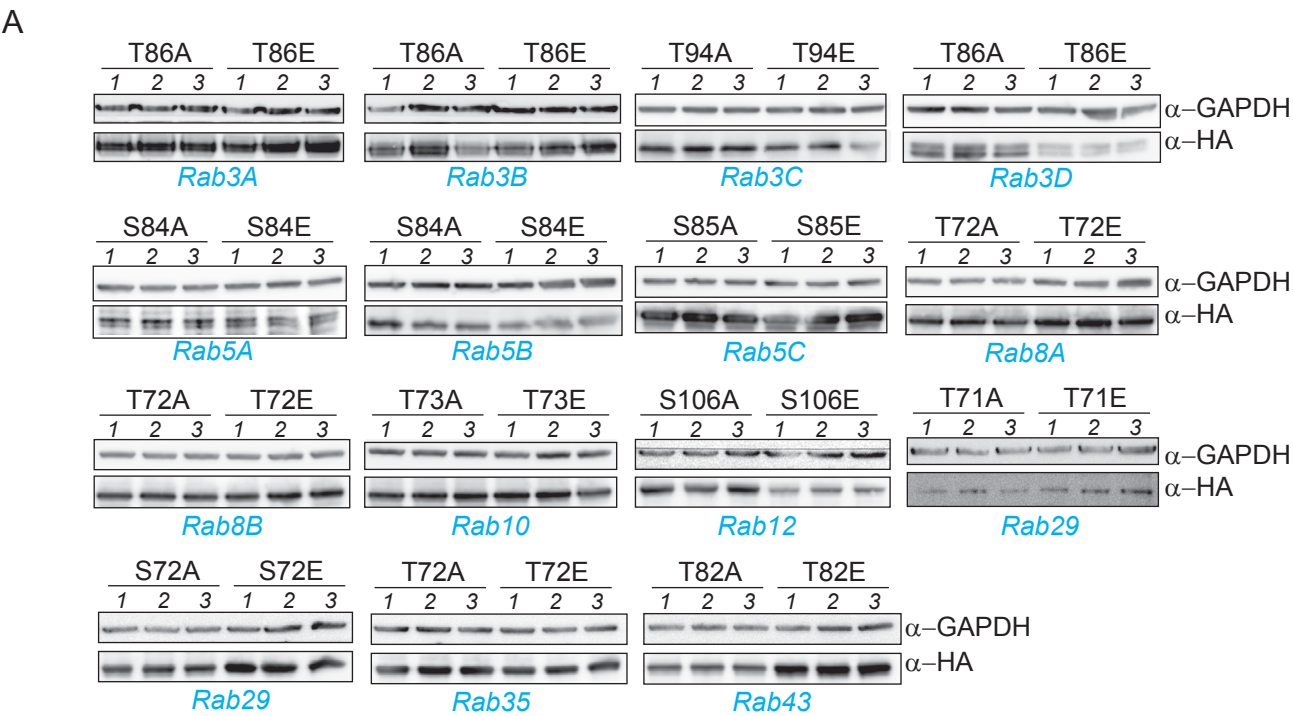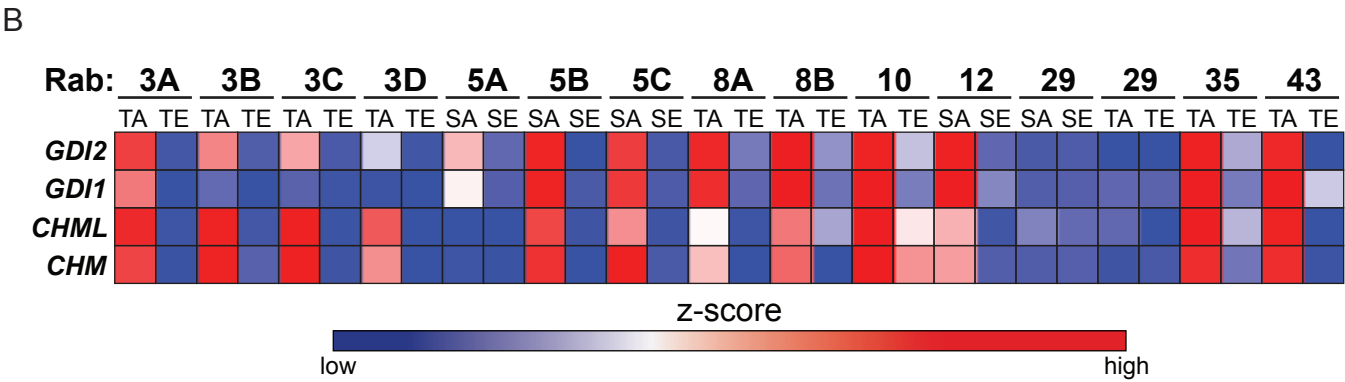

Supplement: supp [file elife-31012-supp-v1.zip › elife_poa_e31012_Figure_3_figure_supplement_1.pdf]

A

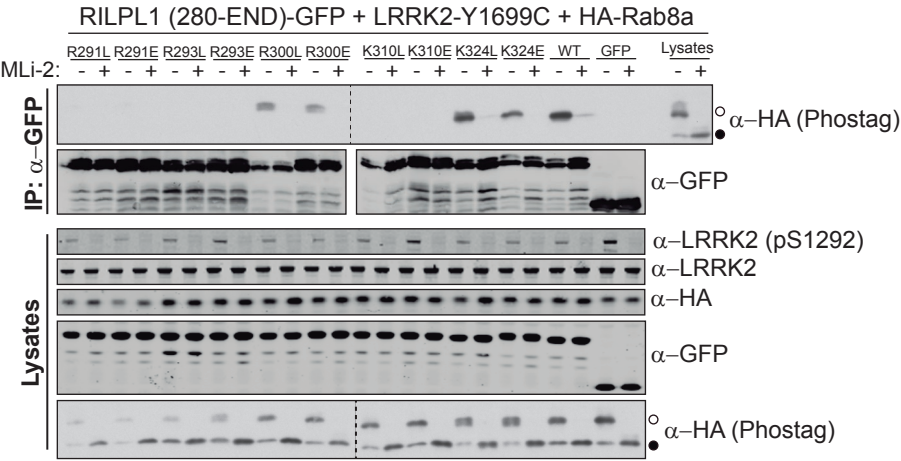

B

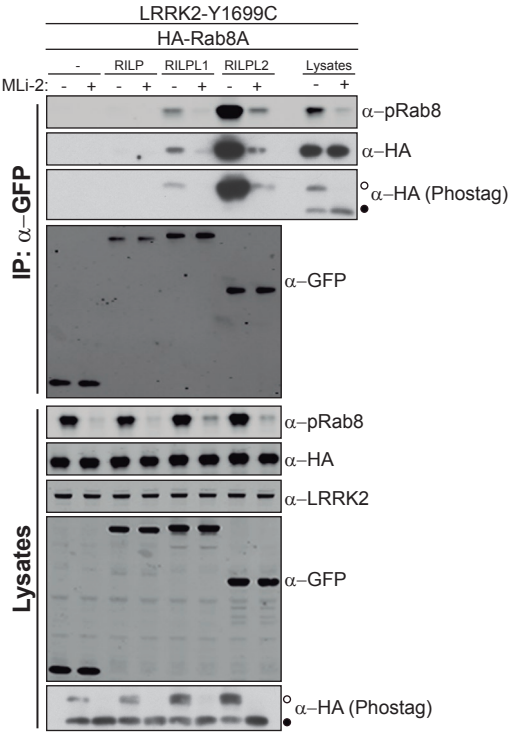

C

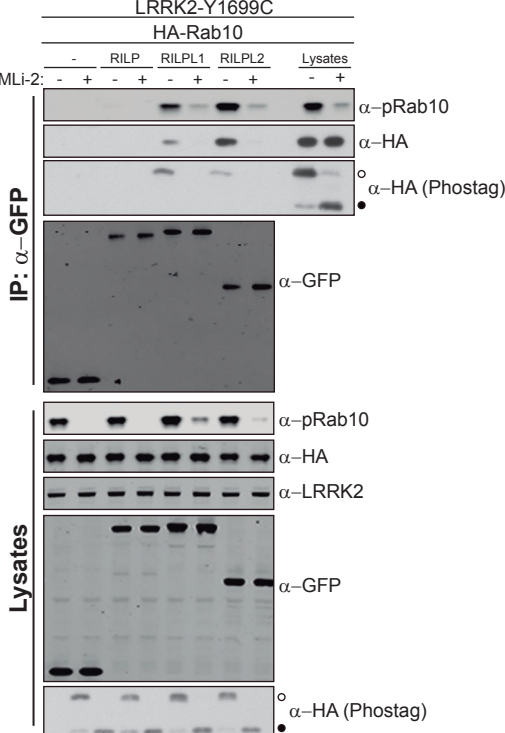

D

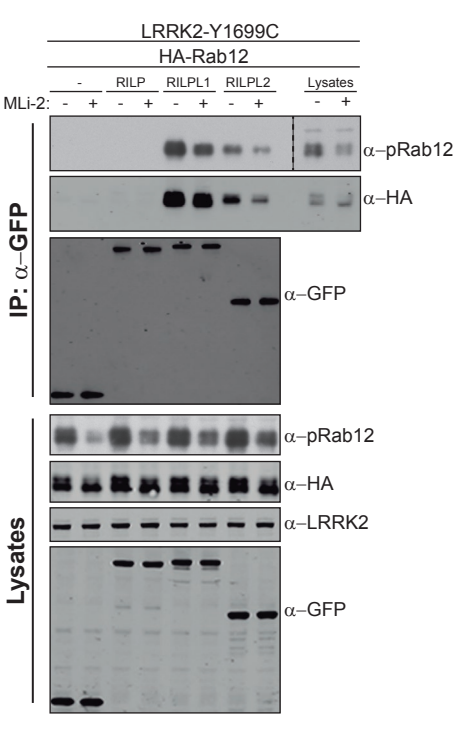

Supplement: supp [file elife-31012-supp-v1.zip › elife_poa_e31012_Figure_3_figure_supplement_3.pdf]

A

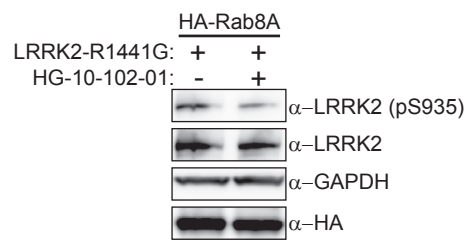

C

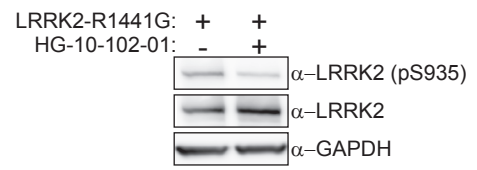

B

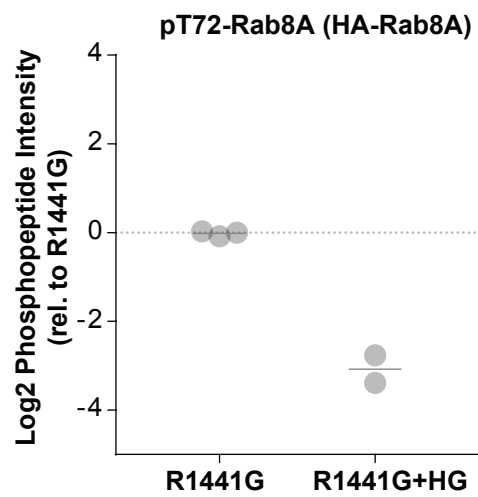

D

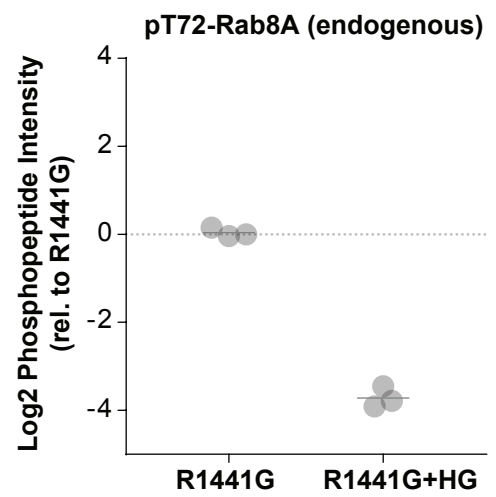

Supplement: supp [file elife-31012-supp-v1.zip › elife_poa_e31012_Figure_3_figure_supplement_2.pdf]
